# Supplementary material
Source: MDPI journal article supplement (https://www.mdpi.com/2073-4441/16/2/238)
Supplement: s1 [file s1]

**Table S1.** Results of the calibration curve of domestic double-circle quantitative filter paper at 25 °C, 40 °C.

| Molality<br>/(mol L <sup>-1</sup> ) | 25 °C        |              | 40 °C        |              |
|-------------------------------------|--------------|--------------|--------------|--------------|
|                                     | $\Psi$ (kPa) | $W_{fp}$ (%) | $\Psi$ (kPa) | $W_{fp}$ (%) |
| 0.001                               | 4.90         | 44.54        | 5.15         | 32.61        |
| 0.002                               | 9.76         | 44.42        | 10.24        | 32.09        |
| 0.005                               | 24.20        | 41.83        | 25.40        | /            |
| 0.010                               | 48.00        | 41.55        | 50.38        | 29.12        |
| 0.020                               | 95.04        | /            | 99.72        | /            |
| 0.050                               | 233.91       | 32.73        | 245.26       | /            |
| 0.100                               | 462.12       | 29.76        | 484.80       | 25.81        |
| 0.200                               | 914.92       | 24.76        | 960.53       | 23.81        |
| 0.300                               | 1369.77      | 23.55        | 1439.39      | 23.34        |
| 0.400                               | 1822.90      | 22.24        | 1917.31      | 20.80        |
| 0.500                               | 2282.46      | 20.52        | 2402.76      | 20.20        |
| 0.600                               | 2743.56      | 19.13        | 2890.65      | 18.99        |
| 0.800                               | 3681.49      | 17.42        | 3884.61      | 17.13        |
| 1.000                               | 4639.54      | 16.16        | 4901.07      | 14.80        |
| 1.200                               | 5619.80      | 14.54        | 5941.27      | 14.64        |
| 1.400                               | 6623.07      | 13.13        | 7005.85      | 13.94        |
| 1.800                               | 8706.34      | 11.68        | 9213.72      | 11.97        |
| 2.000                               | 9788.74      | 11.27        | 10358.28     | 9.26         |
| 2.500                               | 12585.41     | 9.77         | 13322.56     | 8.68         |

\*  $\Psi$ : the matric suction;  $W_{fp}$ : water content of filter paper; /: invalid data.
